# Supplementary material for: Optimization of smashing tissue and ultrasonic extraction of tanshinones and their neuroprotective effect on cerebral ischemia/reperfusion injury by inhibiting parthanatos
Source: Royal Society of Chemistry journal article supplement (doi:10.1039/d2fo01902g), 2022-01-01
Supplement: d2fo01902g1.pdf [file d2fo01902g1.pdf]

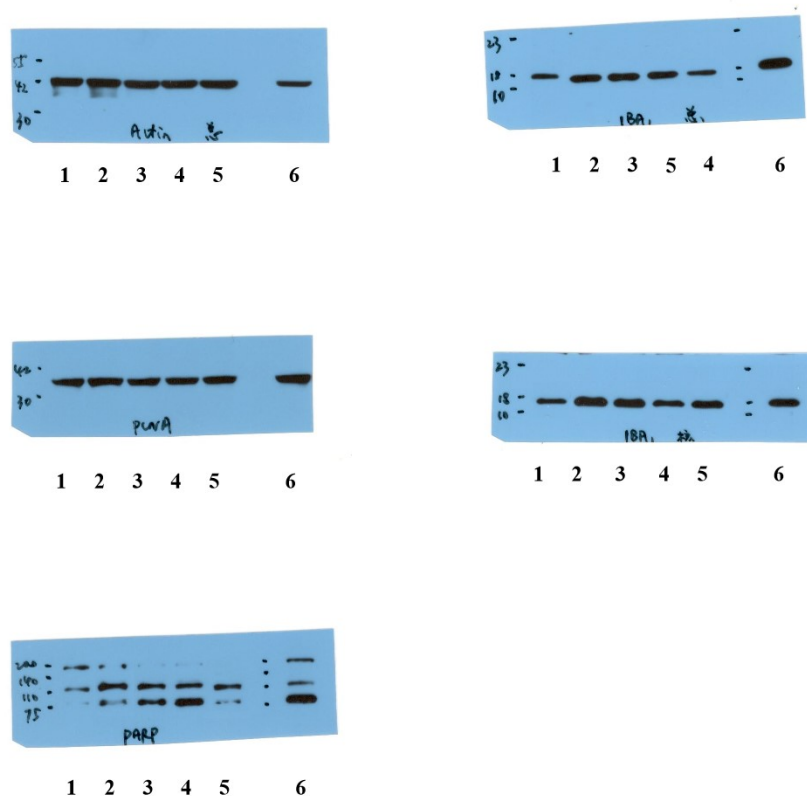

Figure 1: The original image of Western Blots. (1: Sham group, 2: MCAO/R group, 3: MCAO/R+SM extract group, 4: MCAO/R+PJ34 group, 5: MCAO/R+NBP group, 6: Control group)

Table 1: The gray value of western blots in different groups

|   | Actin  | IBA1(cytoplasm AIF) | PCNA   | IBA1(unclear AIF) | PAPR1  |
|---|--------|---------------------|--------|-------------------|--------|
| 1 | 284580 | 131692              | 244944 | 150811            | 64328  |
| 2 | 319232 | 244944              | 292668 | 308760            | 187200 |
| 3 | 315280 | 230925              | 275680 | 263760            | 150176 |
| 4 | 303456 | 218218              | 255340 | 188188            | 123298 |
| 5 | 310155 | 133650              | 270812 | 236763            | 125954 |
